# Supplementary material for: Reconciling the bottom-up and top-down estimates of the methane chemical sink using multiple observations
Source: Copernicus journal article supplement (doi:10.5194/acp-23-789-2023), 2023-01-17
Supplement: Supplementary file 1 [file acp-23-789-2023-supplement.pdf]

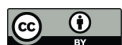

*Supplement of*

## **Reconciling the bottom-up and top-down estimates of the methane chemical sink using multiple observations**

**Yuanhong Zhao et al.**

*Correspondence to:* Yuanhong Zhao (zhaoyuanhong@ouc.edu.cn)

The copyright of individual parts of the supplement might differ from the article licence.

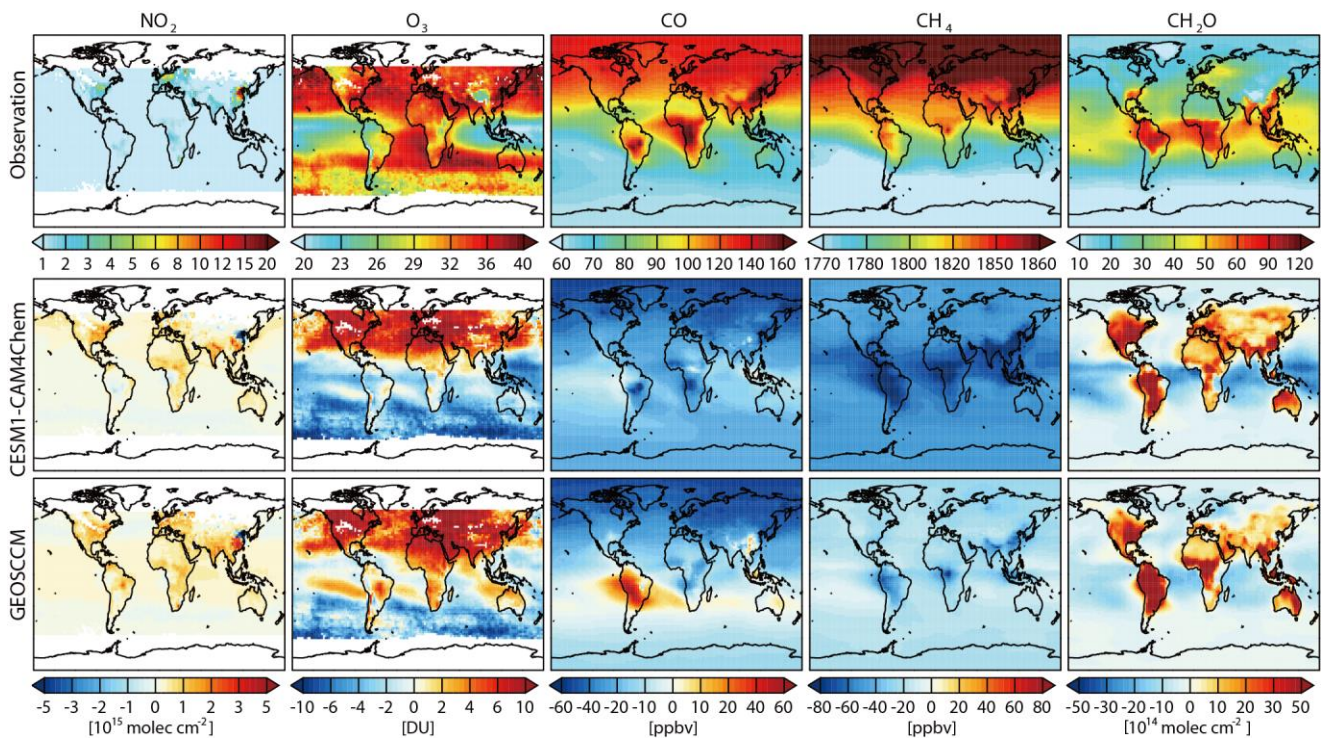

**Figure S1.** Spatial distribution of the tropospheric mean OH precursors from observations (top) and the difference in the OH precursors between CESM1-CAM4chem (middle) and GEOSCCM (bottom) simulations and the observations (model – observation).

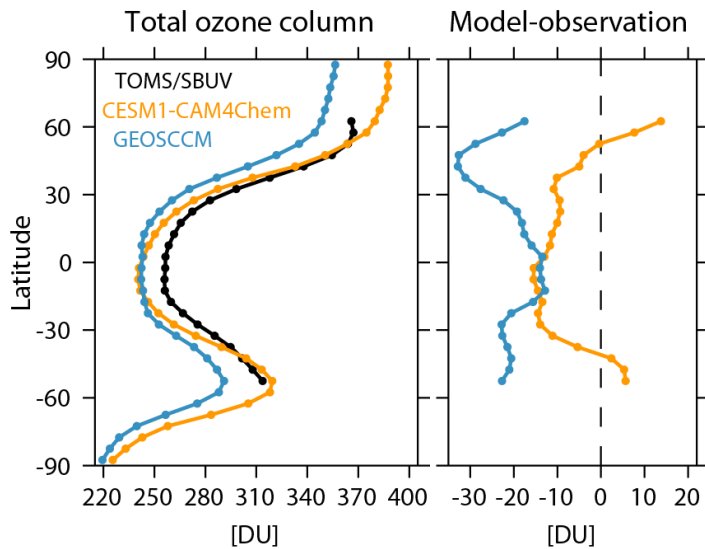

**Figure S2.** Left: The latitude means of total ozone column from TOMS/SBUV observations (black), and CESM1-CAM4chem (yellow) and GEOSCCM (blue) simulations. Right: the difference in observed total ozone column between CESM1-CAM4chem (yellow) and GEOSCCM (blue) simulations and the observations (Model – observation).

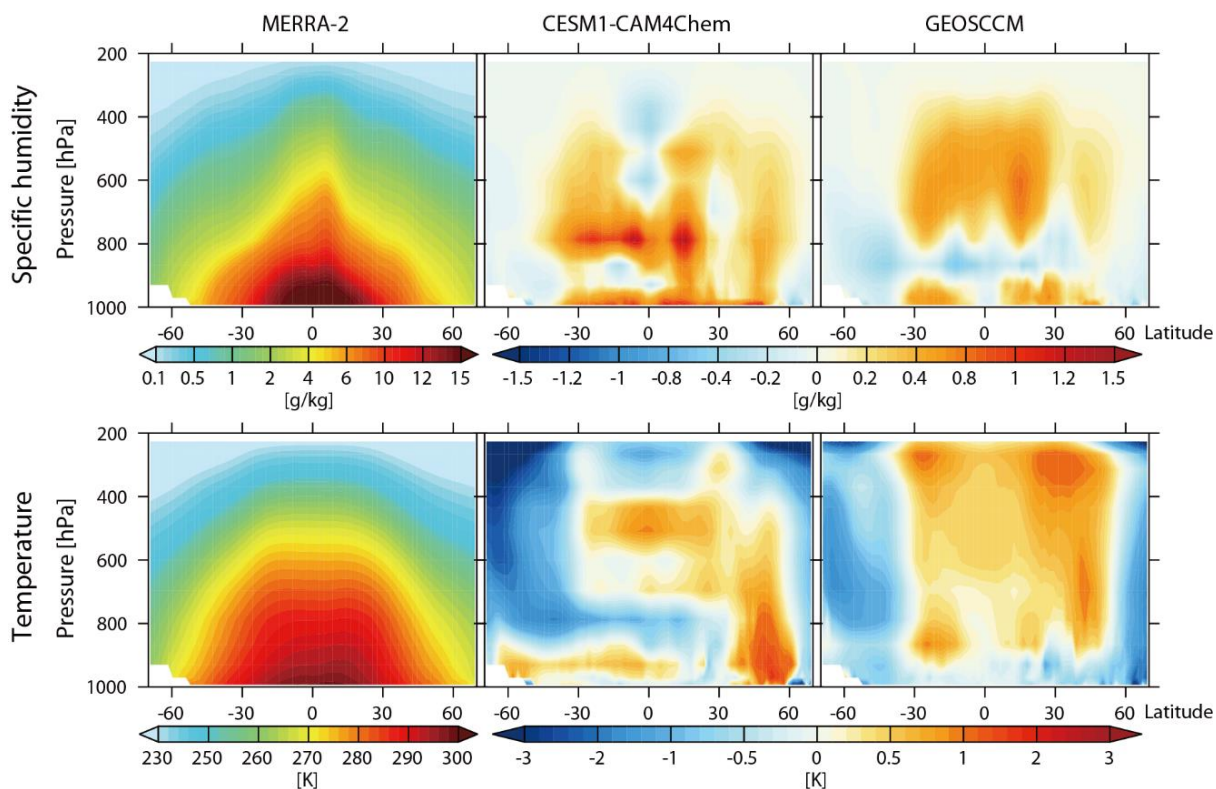

**Figure S3.** Latitude-height cross sections of specific humidity (top) and air temperature (bottom) from MERRA-2 reanalysis data (left) and the differences of CSM1-CAM4chem (middle) and GEOSCCM (right) simulations with the reanalysis data (model – MERRA-2).

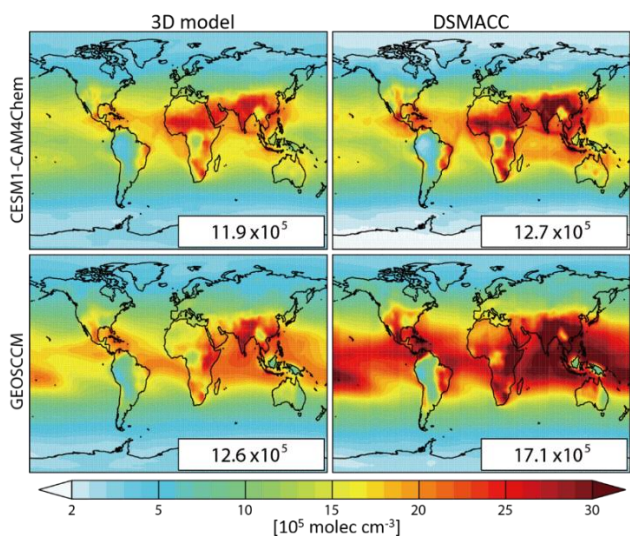

**Figure S4.** Spatial distributions of air mass-weighted tropospheric mean  $[OH]$  ( $[OH]_{\text{trop-M}}$ ) in 2010 from 3D model simulations (left) and chemical box model (DSMACC) simulations driven by the corresponding 3D model outputs (right). The global mean values are shown inset in  $\text{molec cm}^{-3}$ .

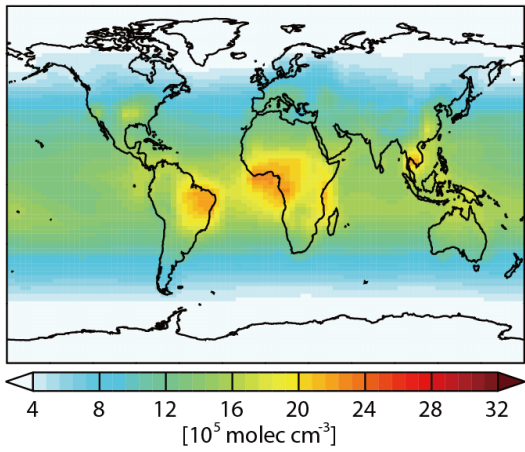

**Figure S5.** Spatial distribution of tropospheric mean [OH] estimated by Spiavkovsky et al. (2000).

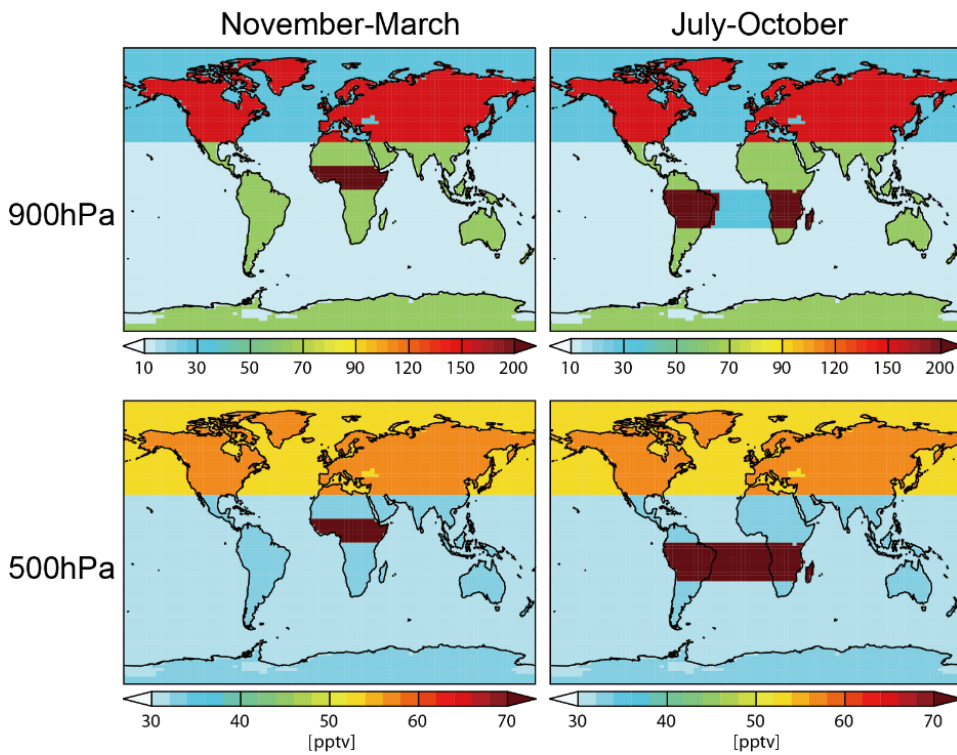

**Figure S6.** Spatial distribution of  $\text{NO}_y$  given by Spiavkovsky et al. (2000) averaged over November to March (left) and July to October (right) at 900hPa (top) and 500hPa (bottom).

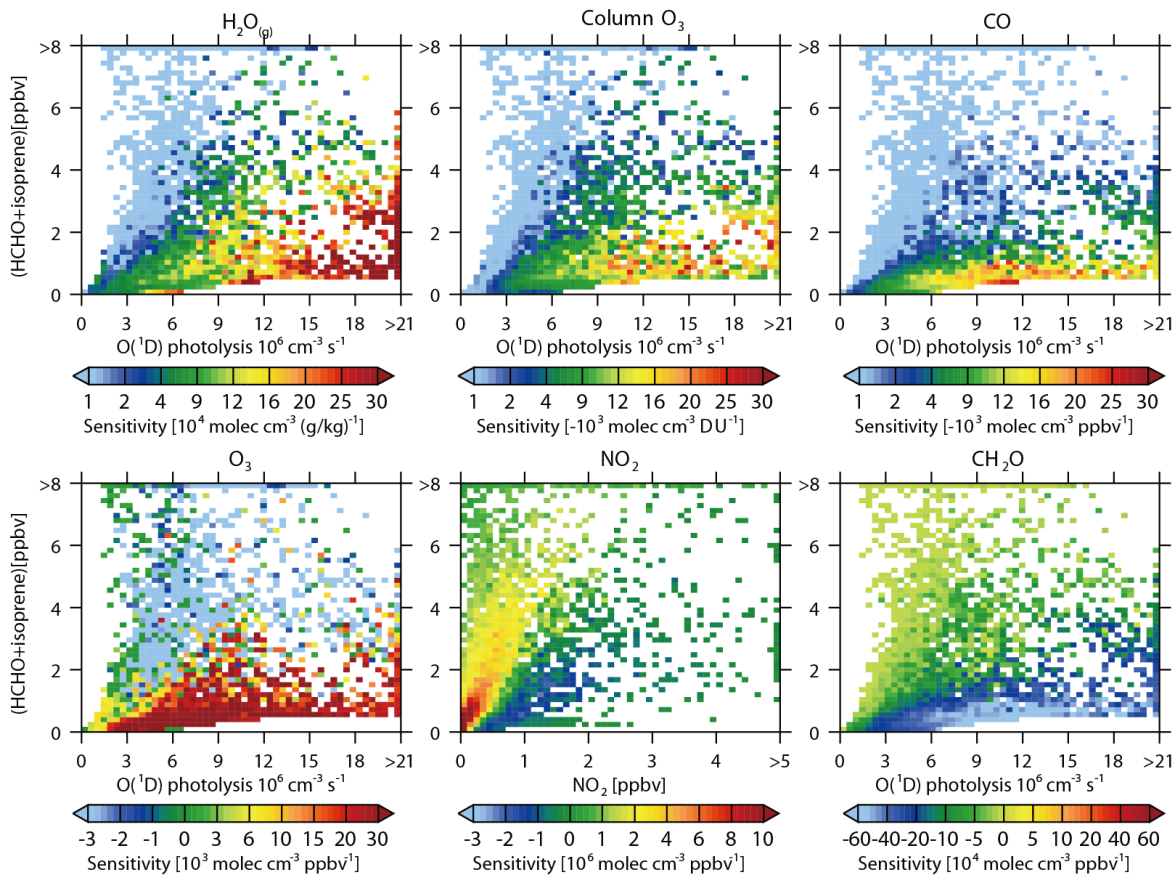

**Figure S7.** Sensitivity of  $[\text{OH}]$  to individual factors (filled colors) as a function of HCHO+isoprene mixing ratio (y-axis) and  $\text{O}(^1\text{D})$  photolysis rate or  $\text{NO}_2$  mixing ratio estimated by the DSMACC simulations using MOZART-4 chemical mechanism.

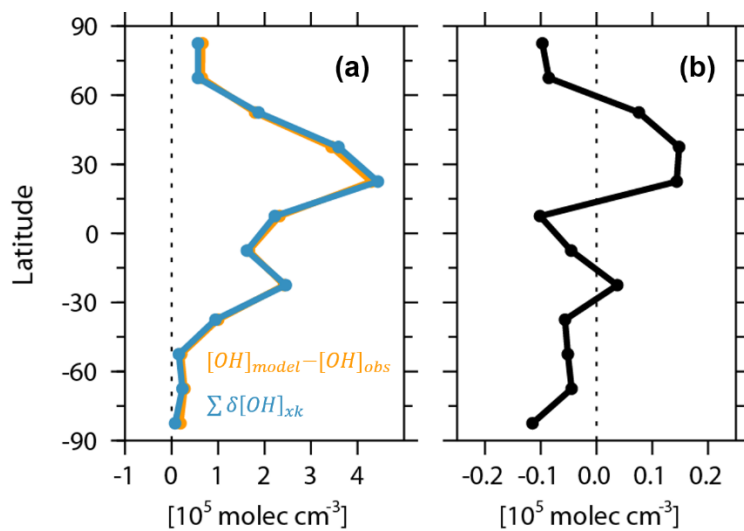

**Figure S8.** (a) Zonal averaged difference between modeled and observation-based  $[\text{OH}]_{\text{trop-M}}$  estimated by the All\_obs simulation ( $[\text{OH}]_{\text{model}} - [\text{OH}]_{\text{obs}}$ ; yellow); The total contribution of the 8 individual factors to the difference in global  $[\text{OH}]_{\text{trop-M}}$  estimated from the simulation xk\_obs simulations ( $\sum \delta[\text{OH}]_{xk}$ ; blue). (b) The difference between the two estimates ( $\sum \delta[\text{OH}]_{xk} - ([\text{OH}]_{\text{model}} - [\text{OH}]_{\text{obs}})$ ).
